# Supplementary material for: Incorporating Virtual Reactions into a Logic-based Ligand-based Virtual Screening Method to Discover New Leads
Source: PubMed Central journal article supplement (PMC4641463; doi:10.1002/minf.201400162), 2015-03-20
Supplement: minf0034-0615-sd1.pdf [file minf0034-0615-sd1.pdf]

# molecular informatics

models – molecules – systems

## Supporting Information

© Copyright Wiley-VCH Verlag GmbH & Co. KGaA, 69451 Weinheim, 2014

## Appendix A Virtual reactions encoded in INDDEx for this study

Table A1 lists the 26 reactions implemented as virtual reactions in INDDEx for the all the tests and assessments described in this paper. All were chosen as two-reactant addition reactions, and the rules describing elements of substructure and charge to include and exclude molecules as reactants in a viable reaction were taken from the ChemAxon Reactor database [8].

**Table A1.** List of the 26 virtual reactions provided by ChemAxon that were incorporated into INDDEx.

---

|                                         |                                |
|-----------------------------------------|--------------------------------|
| Acid azide synthesis                    | Houben Hoesch phenol acylation |
| Baylis-Hillman vinyl alkylation         | Imino ester synthesis          |
| Benary conjugated carbonyl synthesis    | Isocyanate with nucleophile    |
| Borch reductive amination               | Knoevenagel condensation       |
| Chan Lam coupling                       | Kumada coupling                |
| Darzens epoxide synthesis               | Perkin reaction                |
| Fischer indole synthesis                | Quellet chloroalkylation       |
| Friedel-Crafts acylation                | Ritter reaction of alcohols    |
| Goldberg coupling                       | Ritter reaction of alkenes     |
| Grignard addition to carbonyl compounds | Stille carbonyl synthesis      |
| Guaresky Thorpe pyridone synthesis      | Stille coupling                |
| Heck reaction                           | Suzuki coupling                |
| Henry nitro condensation                | Ullmann condensation           |

---

## Appendix B The DUD target sets

The DUD database contains forty target datasets, each consisting of ligand activity against a different protein target. Table B1 gives a list of all the protein targets, along with a description of each protein's role.

**Table B1.** A list of the 40 DUD targets, and the abbreviations used to refer to them.

| Abbreviation | Full name                                 | Abbreviation  | Full name                                           |
|--------------|-------------------------------------------|---------------|-----------------------------------------------------|
| ACE          | Angiotensin-converting enzyme             | HIVRT         | HIV reverse transcriptase                           |
| ACHE         | Acetylcholine esterase                    | HMGR          | Hydroxymethylglutaryl-coenzyme-A reductase          |
| ADA          | Adenosine deaminase                       | HSP90         | Human heat shock protein 90 kinase                  |
| ALR2         | Aldose reductase                          | InhA          | Enoyl-acyl carrier protein reductase                |
| AmpC         | AmpC-type beta-lactamase                  | MR            | Mineralocorticoid receptor                          |
| AR           | Androgen receptor                         | NA            | Neuraminidase                                       |
| CDK2         | Cyclin dependent kinase 2                 | P38           | P38 mitogen activated protein kinase                |
| COMT         | Catechol O-methyltransferase              | PARP          | Poly(ADP-ribose) polymerase                         |
| COX-1        | Cyclooxygenase 1                          | PDE5          | Phosphodiesterase V                                 |
| COX-2        | Cyclooxygenase 2                          | PDGFRb        | Platelet-derived growth factor receptor kinase beta |
| DHFR         | Dihydrofolate reductase                   | PNP           | Purine nucleoside phosphorylase                     |
| EGFr         | Epidermal growth factor receptor kinase   | PPAR $\gamma$ | Peroxisome proliferator-activated receptor gamma    |
| ER agon.     | Estrogen receptor agonist                 | PR            | Progesterone receptor                               |
| ER antag.    | Estrogen receptor antagonist              | RXR $\alpha$  | Retinoic X receptor alpha                           |
| FGFr1        | Fibroblast growth factor receptor 1       | SAHH          | S-adenosyl-homocysteine hydrolase                   |
| FXa          | Factor Xa                                 | SRC           | Tyrosine kinase SRC                                 |
| GART         | Glycinamide ribonucleotide transformylase | thrombin      | Thrombin                                            |
| GPB          | Glycogen phosphorylase beta               | TK            | Thymidine kinase (type-1)                           |
| GR           | Glucocorticoid receptor                   | trypsin       | Trypsin                                             |
| HIVPR        | HIV protease                              | VEGFR2        | Vascular endothelial growth factor receptor kinase  |

## Appendix C Individual retrieval graphs for each target

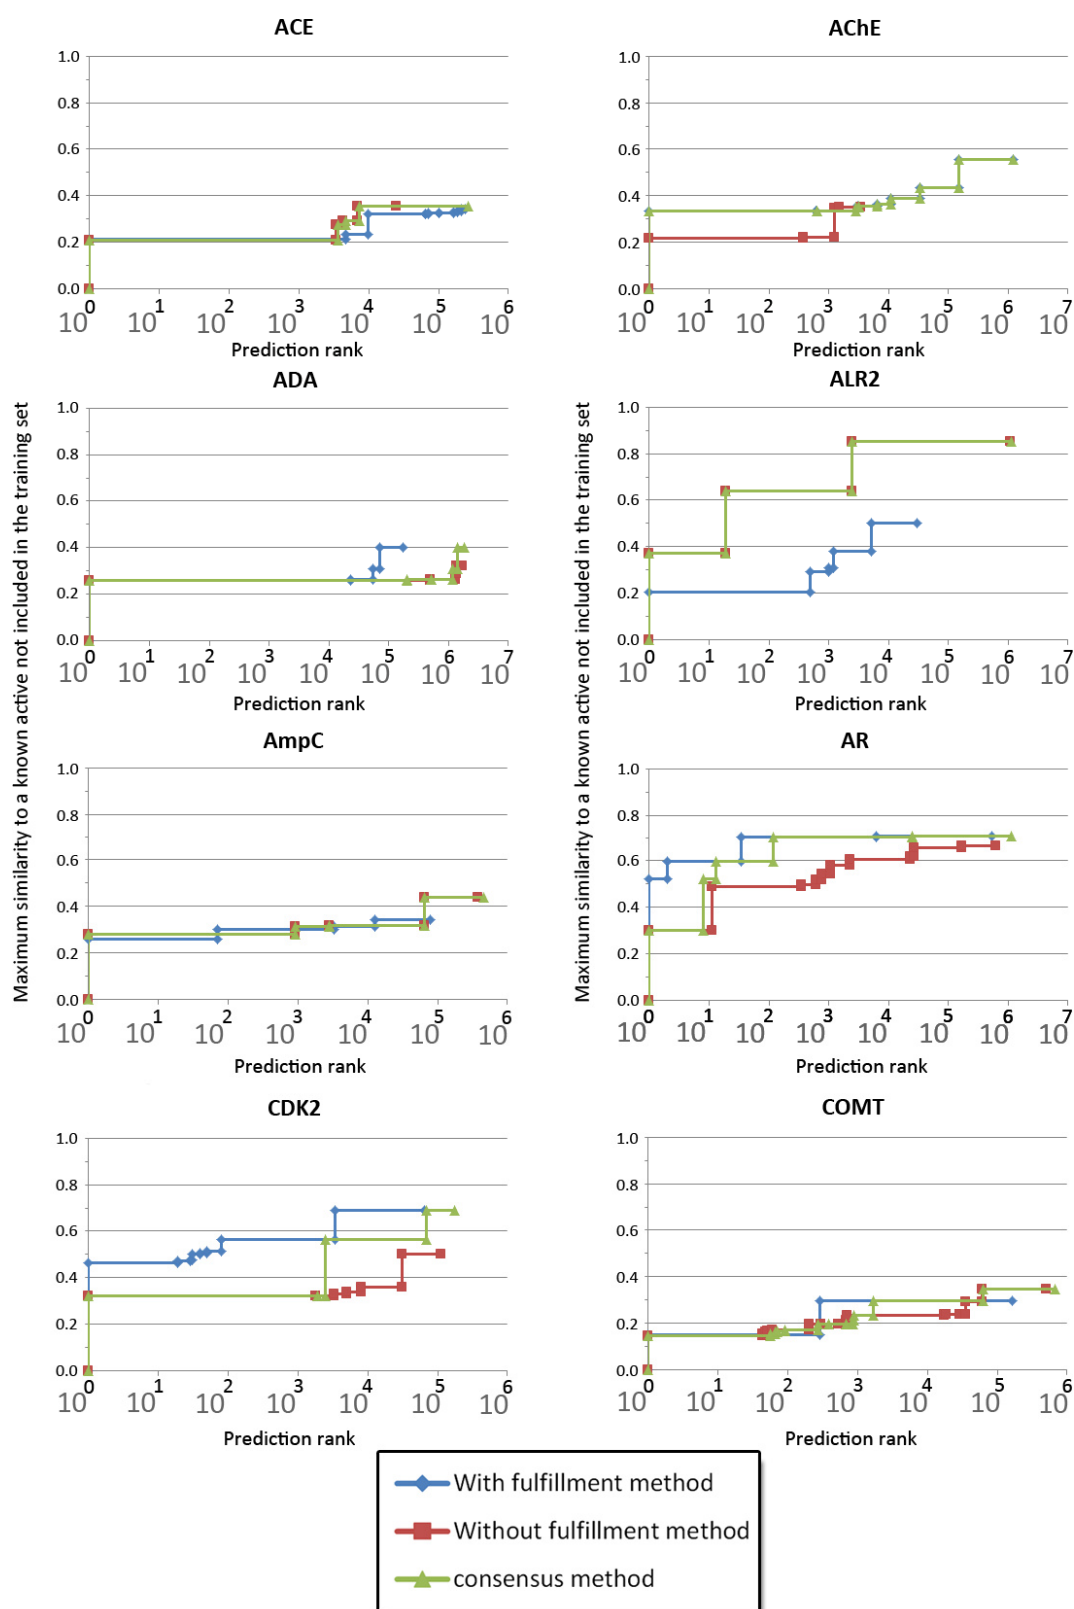

**Figure C1.** Graphs of retrieval at different similarity levels from ACE to COMT. For each graph, the x-axis is the rank order of all the generated virtual products, as predicted by the SVILP model. The y-axis is the maximum MCSS Tanimoto similarity of any virtual product, up to and including this rank, to any of the held-back actives.

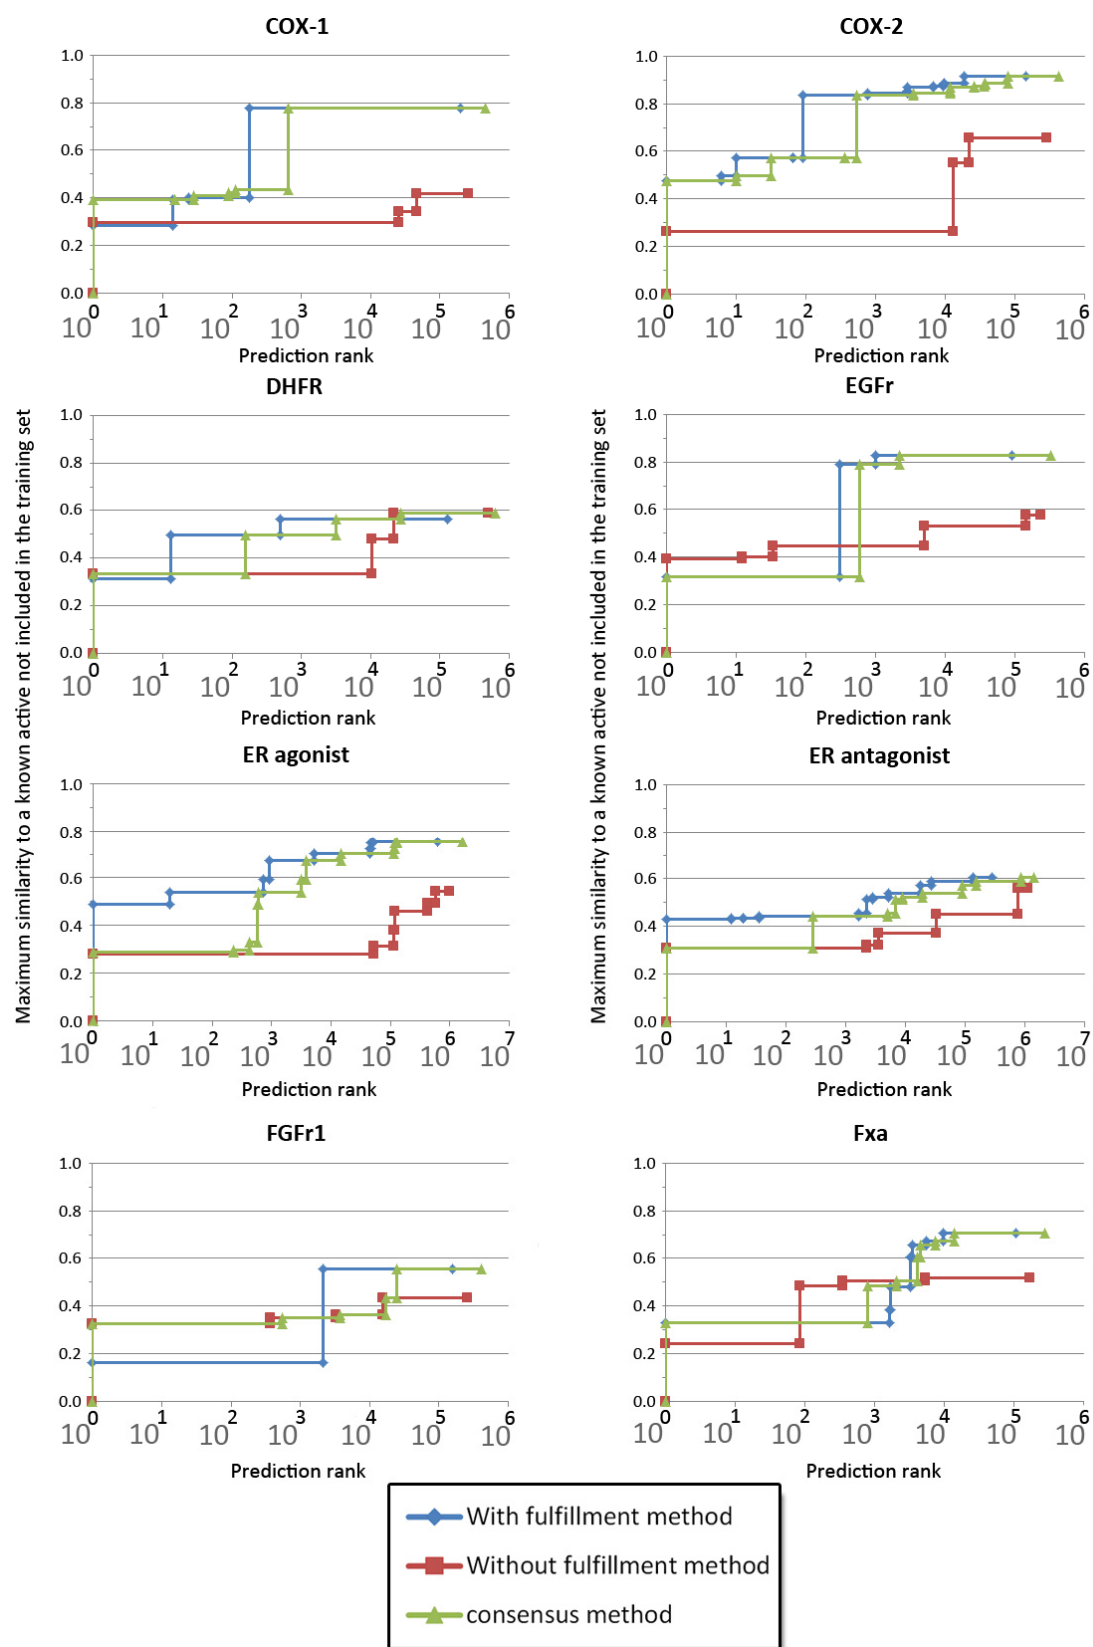

**Figure C2.** Graphs of retrieval at different similarity levels from COX-1 to Fxa. For each graph, the x-axis is the rank order of all the generated virtual products, as predicted by the SVILP model. The y-axis is the maximum MCSS Tanimoto similarity of any virtual product, up to and including this rank, to any of the held-back actives.

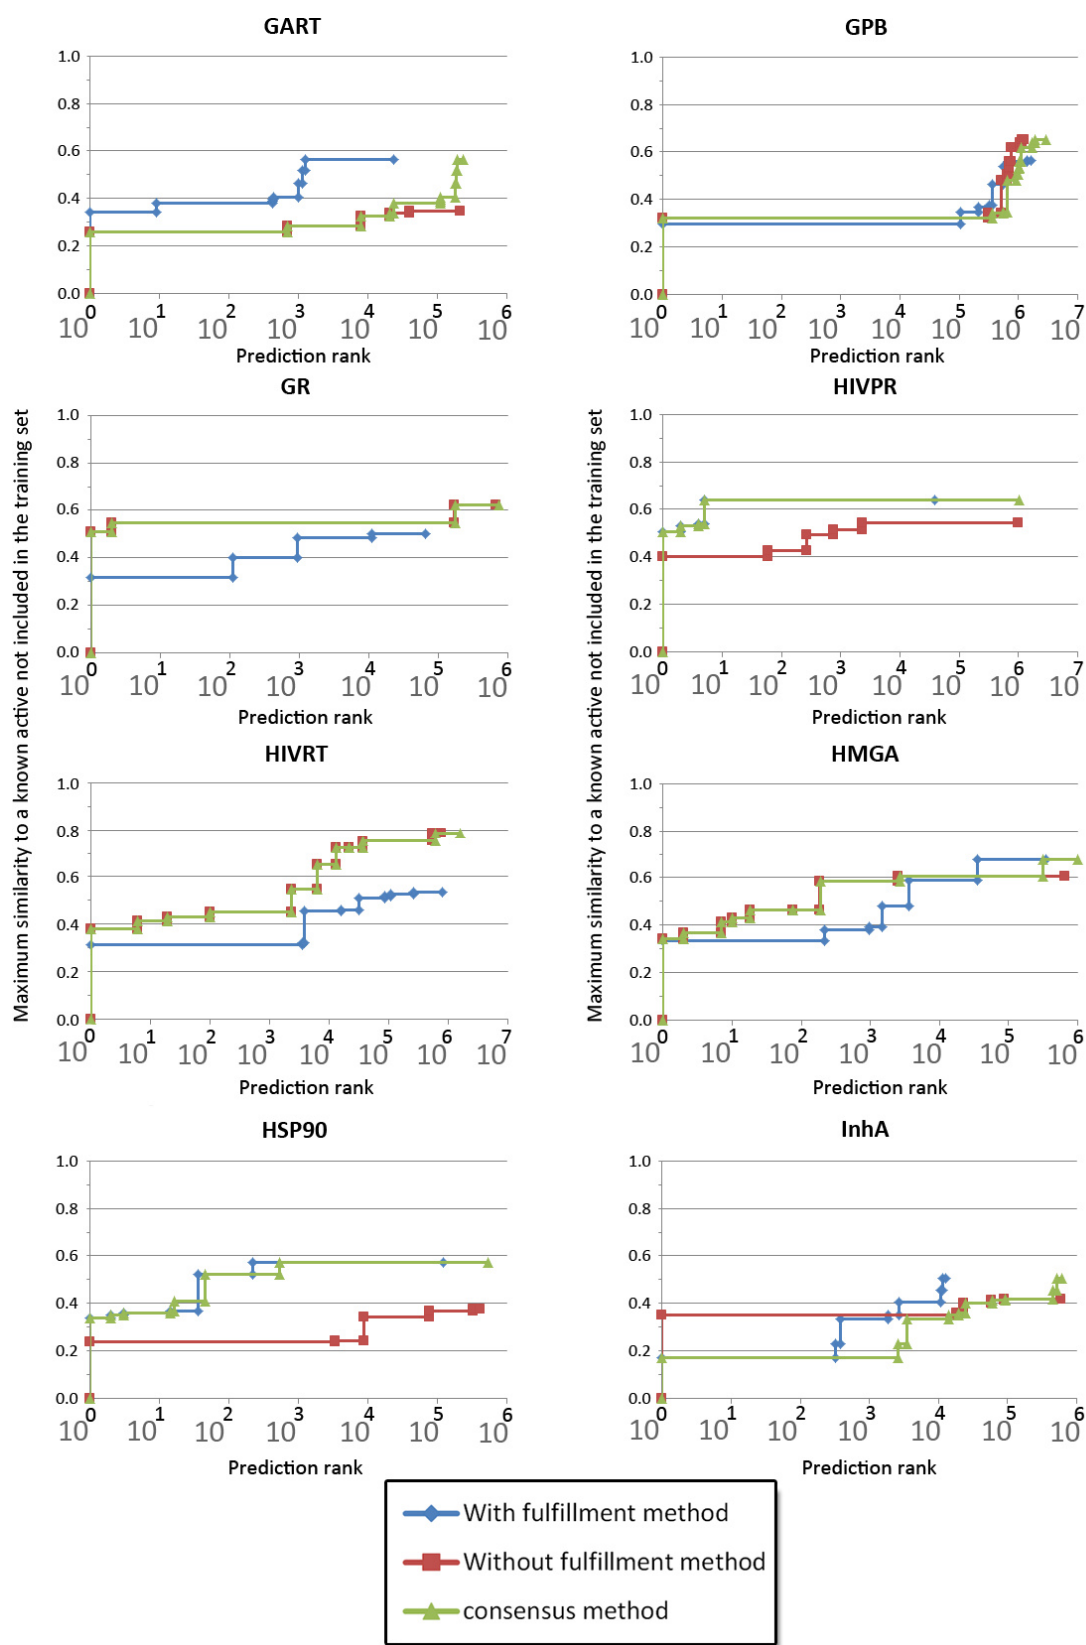

**Figure C3.** Graphs of retrieval at different similarity levels from GART to InhA. For each graph, the x-axis is the rank order of all the generated virtual products, as predicted by the SVILP model. The y-axis is the maximum MCSS Tanimoto similarity of any virtual product, up to and including this rank, to any of the held-back actives.

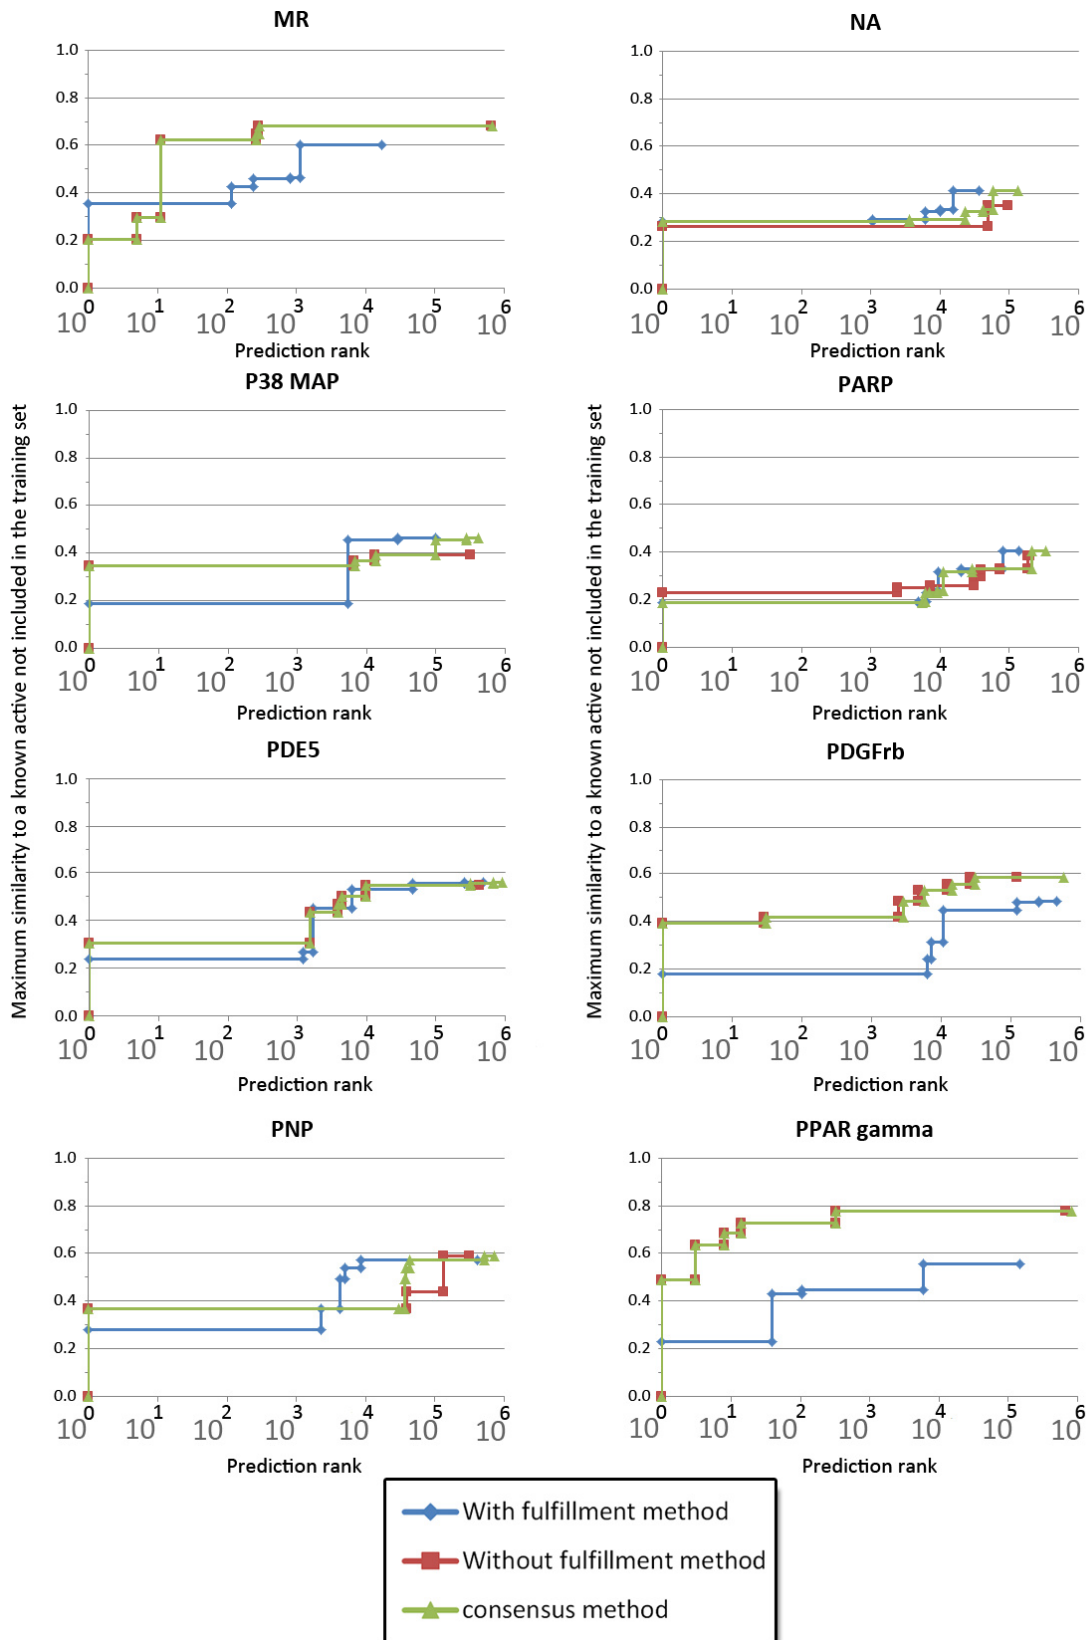

**Figure C4.** Graphs of retrieval at different similarity levels from MR to PPAR gamma. For each graph, the x-axis is the rank order of all the generated virtual products, as predicted by the SVILP model. The y-axis is the maximum MCSS Tanimoto similarity of any virtual product, up to and including this rank, to any of the held-back actives.

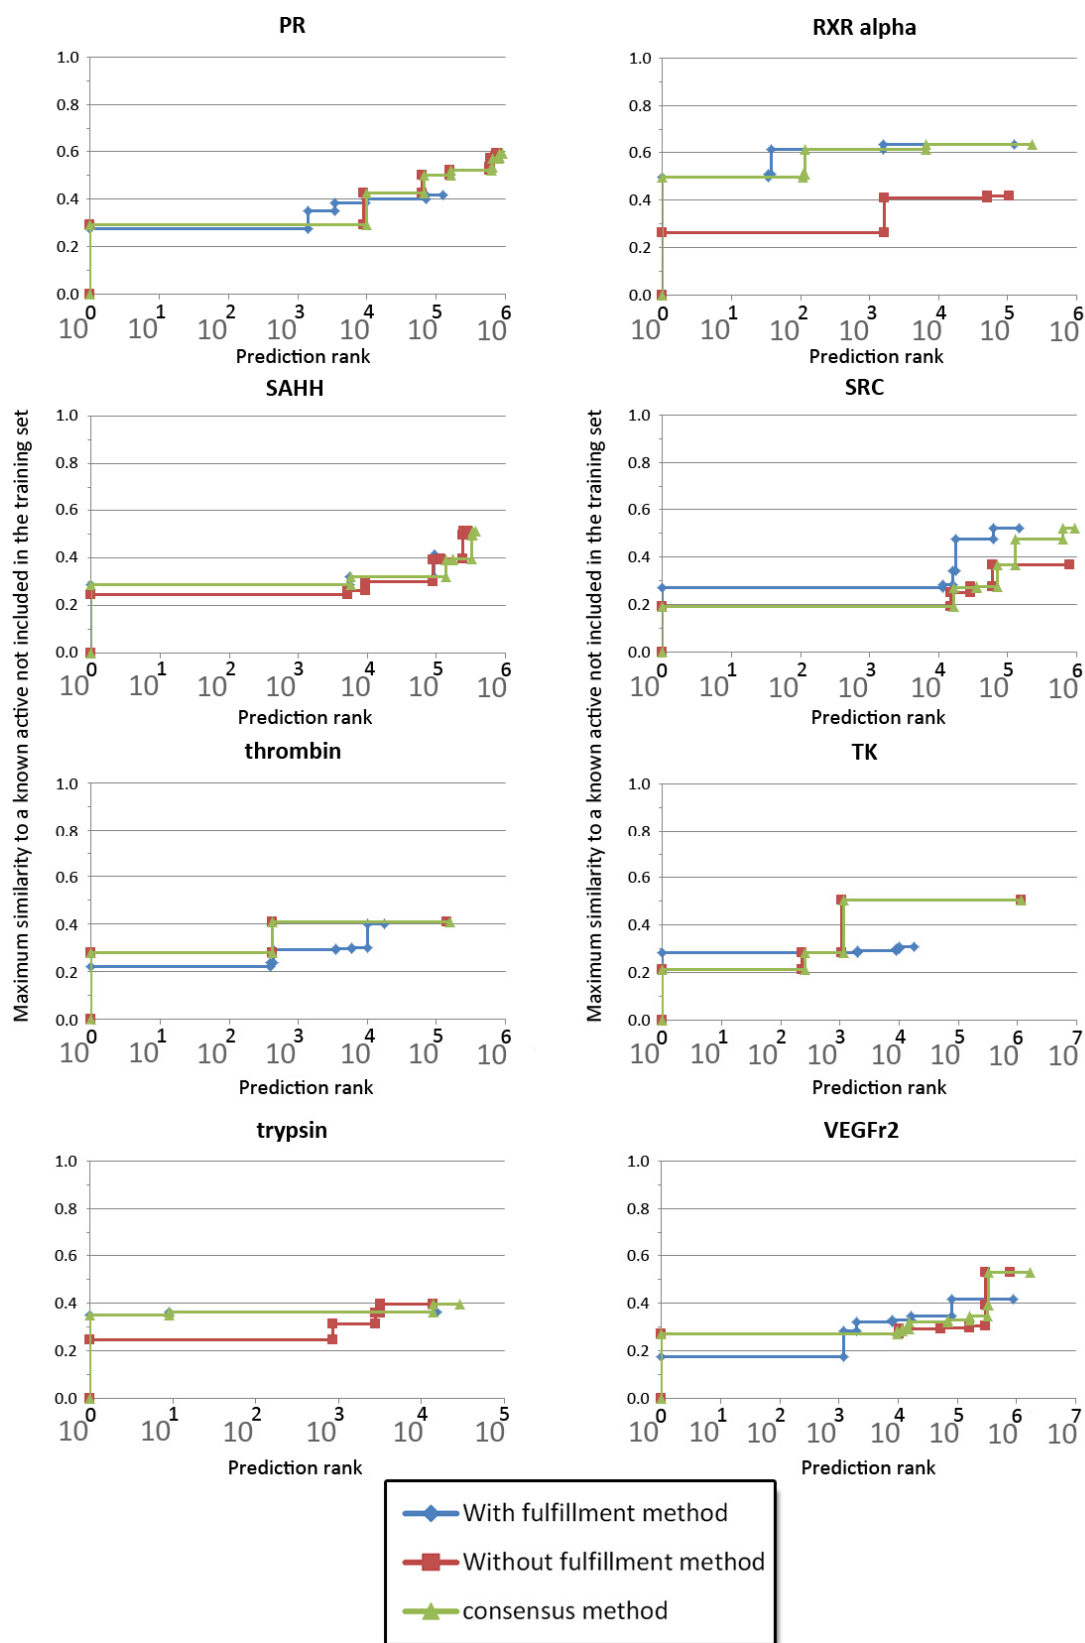

**Figure C5.** Graphs of retrieval at different similarity levels from PR to VEGFr2. For each graph, the x-axis is the rank order of all the generated virtual products, as predicted by the SVILP model. The y-axis is the maximum MCSS Tanimoto similarity of any virtual product, up to and including this rank, to any of the held-back actives.



## Appendix D Results of the virtual screening power assessment

**Table D1.** Table of results of the virtual screening power assessment. The targets in the second column are from the DUD, and a description of each target's abbreviations and biological functions are defined in Appendix B. Mean similarity is the geometric mean of Maximum Common Substructure Tanimoto coefficients. Values are given to two decimal places, and similarities above 0.6 are highlighted in green, above 0.7 in orange, and above 0.8 in red.

| ID | Target dataset | Active ligands | Mean similarity | Max similarity achieved by rank using PLoRRS |      |      | Max similarity achieved by rank using SVILP |      |      | Max similarity achieved by rank using consensus |      |      |
|----|----------------|----------------|-----------------|----------------------------------------------|------|------|---------------------------------------------|------|------|-------------------------------------------------|------|------|
|    |                |                |                 | 10                                           | 100  | 1000 | 10                                          | 100  | 1000 | 10                                              | 100  | 1000 |
| 1  | HIVRT          | 40             | 0.22            | 0.31                                         | 0.31 | 0.31 | 0.41                                        | 0.45 | 0.45 | 0.41                                            | 0.45 | 0.45 |
| 2  | VEGFr2         | 74             | 0.20            | 0.18                                         | 0.18 | 0.18 | 0.27                                        | 0.27 | 0.27 | 0.27                                            | 0.27 | 0.27 |
| 3  | CDK2           | 50             | 0.20            | 0.47                                         | 0.57 | 0.57 | 0.32                                        | 0.32 | 0.32 | 0.32                                            | 0.32 | 0.32 |
| 4  | PDE5           | 51             | 0.20            | 0.24                                         | 0.24 | 0.24 | 0.31                                        | 0.31 | 0.31 | 0.31                                            | 0.31 | 0.31 |
| 5  | COX-1          | 25             | 0.28            | 0.29                                         | 0.40 | 0.78 | 0.30                                        | 0.30 | 0.30 | 0.39                                            | 0.42 | 0.78 |
| 6  | ALR2           | 26             | 0.26            | 0.21                                         | 0.21 | 0.29 | 0.37                                        | 0.64 | 0.64 | 0.37                                            | 0.64 | 0.64 |
| 7  | PDGFRb         | 157            | 0.26            | 0.18                                         | 0.18 | 0.18 | 0.39                                        | 0.42 | 0.42 | 0.39                                            | 0.42 | 0.42 |
| 8  | InhA           | 85             | 0.25            | 0.17                                         | 0.17 | 0.34 | 0.35                                        | 0.35 | 0.35 | 0.17                                            | 0.17 | 0.17 |
| 9  | SRC            | 155            | 0.29            | 0.27                                         | 0.27 | 0.27 | 0.19                                        | 0.19 | 0.19 | 0.19                                            | 0.19 | 0.19 |
| 10 | COMT           | 11             | 0.27            | 0.15                                         | 0.15 | 0.30 | 0.15                                        | 0.17 | 0.24 | 0.15                                            | 0.17 | 0.24 |
| 11 | thrombin       | 65             | 0.35            | 0.22                                         | 0.22 | 0.30 | 0.28                                        | 0.28 | 0.41 | 0.28                                            | 0.28 | 0.41 |
| 12 | ER agon.       | 67             | 0.35            | 0.49                                         | 0.54 | 0.67 | 0.28                                        | 0.28 | 0.28 | 0.29                                            | 0.29 | 0.54 |
| 13 | AChE           | 105            | 0.35            | 0.33                                         | 0.33 | 0.33 | 0.22                                        | 0.22 | 0.22 | 0.33                                            | 0.33 | 0.33 |
| 14 | trypsin        | 44             | 0.38            | 0.36                                         | 0.36 | 0.36 | 0.25                                        | 0.25 | 0.32 | 0.36                                            | 0.36 | 0.36 |
| 15 | HIVPR          | 53             | 0.25            | 0.64                                         | 0.64 | 0.64 | 0.40                                        | 0.43 | 0.51 | 0.64                                            | 0.64 | 0.64 |
| 16 | COX-2          | 348            | 0.28            | 0.57                                         | 0.83 | 0.85 | 0.26                                        | 0.26 | 0.26 | 0.50                                            | 0.57 | 0.83 |
| 17 | FGFR1          | 118            | 0.33            | 0.16                                         | 0.16 | 0.16 | 0.33                                        | 0.33 | 0.35 | 0.33                                            | 0.33 | 0.35 |
| 18 | ER antag.      | 39             | 0.30            | 0.43                                         | 0.44 | 0.44 | 0.31                                        | 0.31 | 0.31 | 0.31                                            | 0.31 | 0.44 |
| 19 | ADA            | 23             | 0.42            | 0.26                                         | 0.26 | 0.26 | 0.26                                        | 0.26 | 0.26 | 0.26                                            | 0.26 | 0.26 |
| 20 | GR             | 78             | 0.35            | 0.32                                         | 0.32 | 0.49 | 0.55                                        | 0.55 | 0.55 | 0.55                                            | 0.55 | 0.55 |
| 21 | AmpC           | 21             | 0.41            | 0.26                                         | 0.30 | 0.30 | 0.28                                        | 0.28 | 0.32 | 0.28                                            | 0.28 | 0.32 |
| 22 | HSP90          | 24             | 0.37            | 0.36                                         | 0.52 | 0.57 | 0.24                                        | 0.24 | 0.24 | 0.36                                            | 0.52 | 0.57 |
| 23 | TK             | 22             | 0.55            | 0.29                                         | 0.29 | 0.29 | 0.21                                        | 0.21 | 0.28 | 0.21                                            | 0.21 | 0.28 |
| 24 | P38 MAP        | 256            | 0.34            | 0.19                                         | 0.19 | 0.19 | 0.35                                        | 0.35 | 0.35 | 0.35                                            | 0.35 | 0.35 |
| 25 | AR             | 74             | 0.31            | 0.60                                         | 0.70 | 0.70 | 0.30                                        | 0.49 | 0.54 | 0.53                                            | 0.60 | 0.70 |
| 26 | MR             | 15             | 0.45            | 0.36                                         | 0.36 | 0.46 | 0.30                                        | 0.62 | 0.68 | 0.30                                            | 0.62 | 0.68 |
| 27 | PR             | 27             | 0.34            | 0.28                                         | 0.28 | 0.28 | 0.29                                        | 0.29 | 0.29 | 0.29                                            | 0.29 | 0.29 |
| 28 | PARP           | 33             | 0.50            | 0.19                                         | 0.19 | 0.19 | 0.23                                        | 0.23 | 0.23 | 0.19                                            | 0.19 | 0.19 |
| 29 | EGFR           | 444            | 0.41            | 0.32                                         | 0.32 | 0.83 | 0.39                                        | 0.45 | 0.45 | 0.32                                            | 0.32 | 0.79 |
| 30 | Fxa            | 142            | 0.27            | 0.33                                         | 0.33 | 0.33 | 0.24                                        | 0.49 | 0.51 | 0.33                                            | 0.33 | 0.49 |
| 31 | PNP            | 25             | 0.50            | 0.28                                         | 0.28 | 0.28 | 0.37                                        | 0.37 | 0.37 | 0.37                                            | 0.37 | 0.37 |
| 32 | ACE            | 49             | 0.35            | 0.21                                         | 0.21 | 0.21 | 0.21                                        | 0.21 | 0.21 | 0.21                                            | 0.21 | 0.21 |
| 33 | HMGA           | 35             | 0.47            | 0.33                                         | 0.33 | 0.39 | 0.43                                        | 0.46 | 0.58 | 0.43                                            | 0.46 | 0.58 |
| 34 | GPB            | 52             | 0.49            | 0.30                                         | 0.30 | 0.30 | 0.32                                        | 0.32 | 0.32 | 0.32                                            | 0.32 | 0.32 |
| 35 | PPAR $\gamma$  | 81             | 0.44            | 0.23                                         | 0.43 | 0.45 | 0.68                                        | 0.73 | 0.78 | 0.68                                            | 0.73 | 0.78 |
| 36 | NA             | 49             | 0.36            | 0.28                                         | 0.28 | 0.28 | 0.26                                        | 0.26 | 0.26 | 0.28                                            | 0.28 | 0.28 |
| 37 | DHFR           | 201            | 0.35            | 0.31                                         | 0.50 | 0.57 | 0.33                                        | 0.33 | 0.33 | 0.33                                            | 0.33 | 0.50 |
| 38 | GART           | 21             | 0.47            | 0.38                                         | 0.38 | 0.46 | 0.26                                        | 0.26 | 0.28 | 0.26                                            | 0.26 | 0.28 |

|                                                        |              |    |      |      |      |      |      |      |      |      |      |      |
|--------------------------------------------------------|--------------|----|------|------|------|------|------|------|------|------|------|------|
| 39                                                     | SAHH         | 33 | 0.44 | 0.29 | 0.29 | 0.29 | 0.25 | 0.25 | 0.25 | 0.29 | 0.29 | 0.29 |
| 40                                                     | RXR $\alpha$ | 20 | 0.72 | 0.50 | 0.62 | 0.62 | 0.26 | 0.26 | 0.26 | 0.50 | 0.50 | 0.62 |
| Number of targets with a similarity value greater than |              |    | 0.6  | 1    | 4    | 7    | 1    | 3    | 3    | 2    | 4    | 9    |
|                                                        |              |    | 0.7  | 0    | 2    | 4    | 0    | 1    | 1    | 0    | 1    | 5    |
|                                                        |              |    | 0.8  | 0    | 1    | 2    | 0    | 0    | 0    | 0    | 0    | 1    |

**Table D2.** One-tailed p-values from the Mann–Whitney U test comparing the three methods when looking at the maximum similarity in both the top 100 and the top 1000 ranked virtual products. Values given to three decimal places.

|                         | SVILP rank 100 | Consensus rank 100 | SVILP rank 1000 | Consensus rank 1000 |
|-------------------------|----------------|--------------------|-----------------|---------------------|
| <b>PLoRRS rank 100</b>  | 0.464          | 0.214              |                 |                     |
| <b>SVILP rank 100</b>   |                | 0.203              |                 |                     |
| <b>PLoRRS rank 1000</b> |                |                    | 0.283           | 0.152               |
| <b>SVILP rank 1000</b>  |                |                    |                 | 0.039               |

## Appendix E Search space reduction

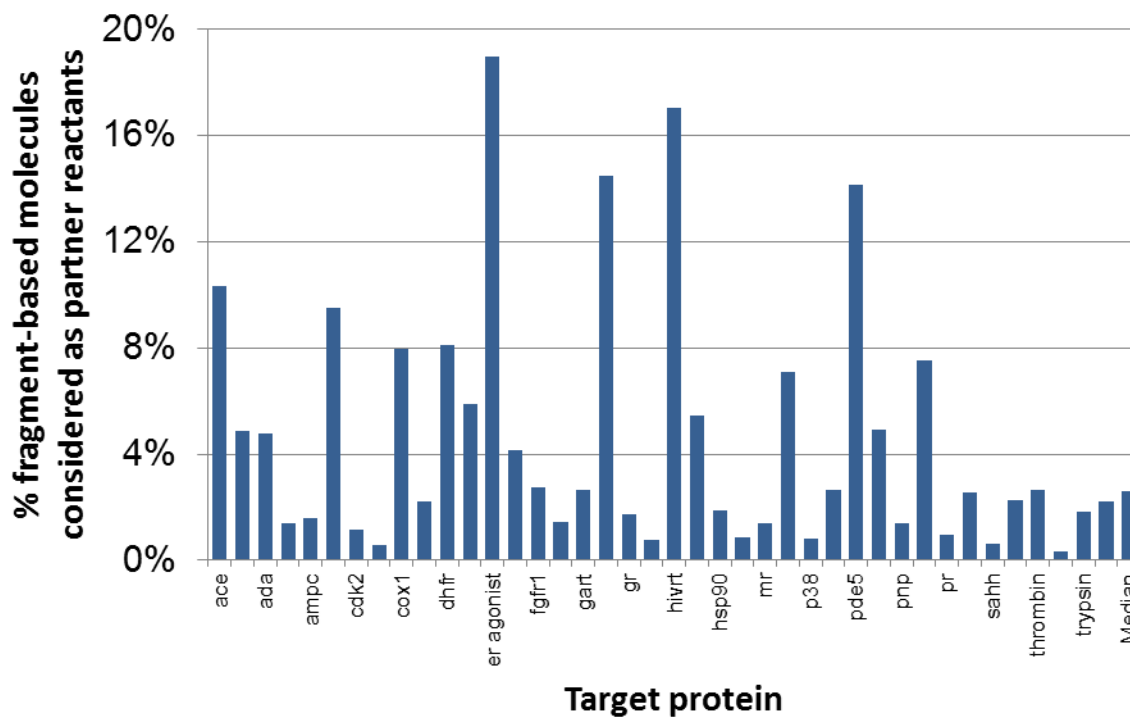

**Figure E1.** Bar chart showing, for each DUD target, the percentage of fragment-like molecules that are considered possible partner reactants after PLoRRS filtering. This chart shows what fraction of the database remains after applying the filter of at least three unfulfilled rules. The figures are calculated from the partner reactants considered for the first-ranked initial molecule screened for each target.
